# Supplementary material
Source: publisher site journal article supplement (https://www.dovepress.com/article/402410)
Supplement: Supplementary file 1 [file get_supplementary_file.php]

Table S1. The size and zeta potential of Fe<sub>3</sub>O<sub>4</sub>@PDA NPs after reacting 0.5, 1, 2 h

| Samples        | Fe <sub>3</sub> O <sub>4</sub> NPs | Fe <sub>3</sub> O <sub>4</sub> @PDA-0.5h NPs | Fe <sub>3</sub> O <sub>4</sub> @PDA -1h NPs | Fe <sub>3</sub> O <sub>4</sub> @PDA -2h NPs |
|----------------|------------------------------------|----------------------------------------------|---------------------------------------------|---------------------------------------------|
| Size           | 231.6 ± 8.8 nm                     | 232.1 ± 13.5 nm                              | 280.8 ± 14.9 nm                             | 300.1 ± 10.3 nm                             |
| Zeta potential | -28.4 ± 1.4 mV                     | -28.4 ± 0.4 mV                               | -28.9 ± 0.6 mV                              | -24.9 ± 0.9 mV                              |

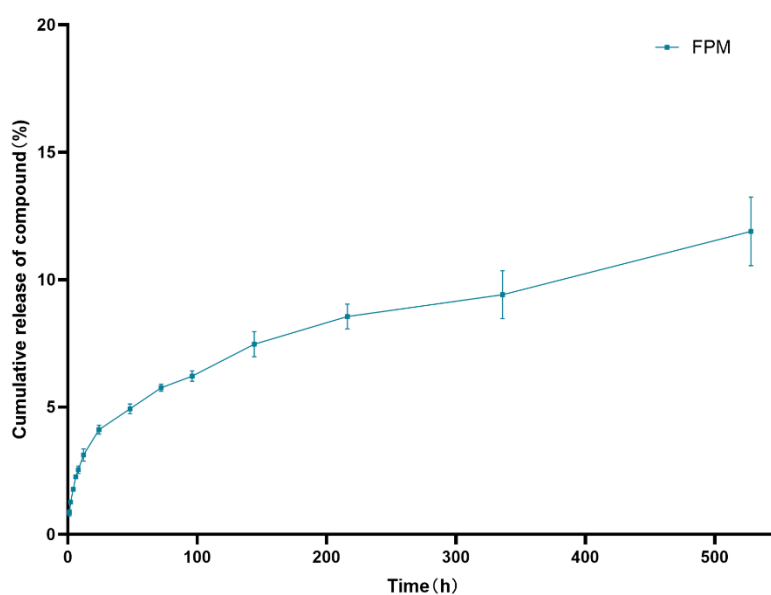

Figure S1: Drug release curve of FPM NPs.

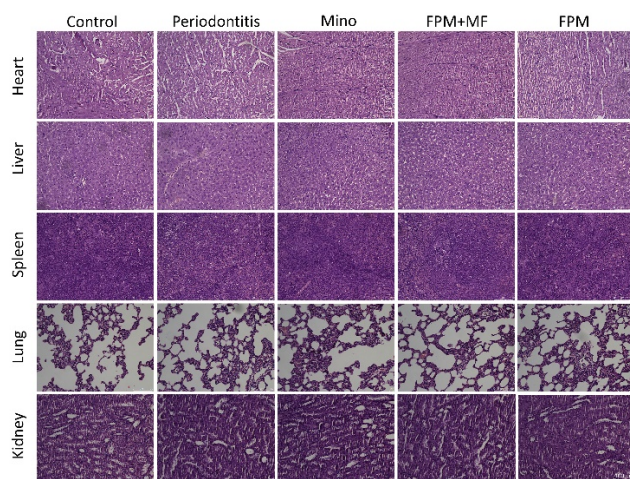

Figure S2: H&E staining of the major organs sections from rats under control and different treatments. Scale bar = 100 μm
